# Supplementary material
Source: PubMed Central journal article supplement (PMC6526721)
Supplement: develop-146-174698-s1.pdf [file develop-146-174698-s1.pdf]

## Figure S1

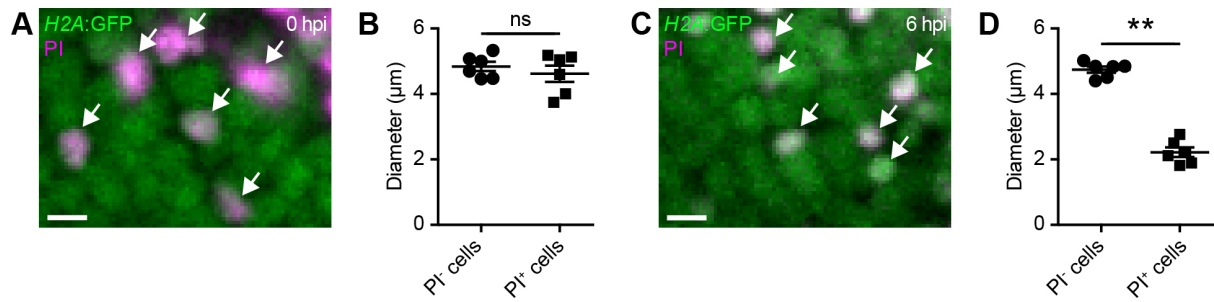

**Figure S1. PI<sup>+</sup> cells are pyknotic at 6 hpi but not at 0 hpi.** (A,C) Confocal images of PI<sup>+</sup> cells (white arrows) in H2A:GFP animals at 0 hpi (A) and 6 hpi (C). Scale bars, 5 μm. (B,D) Quantification of the size of PI<sup>-</sup> and PI<sup>+</sup> cells at 0 hpi (B) and 6 hpi (D). n = 6 animals per experimental group. ns, not significant and \*\*, p < 0.01 in Mann-Whitney test.

## Figure S2

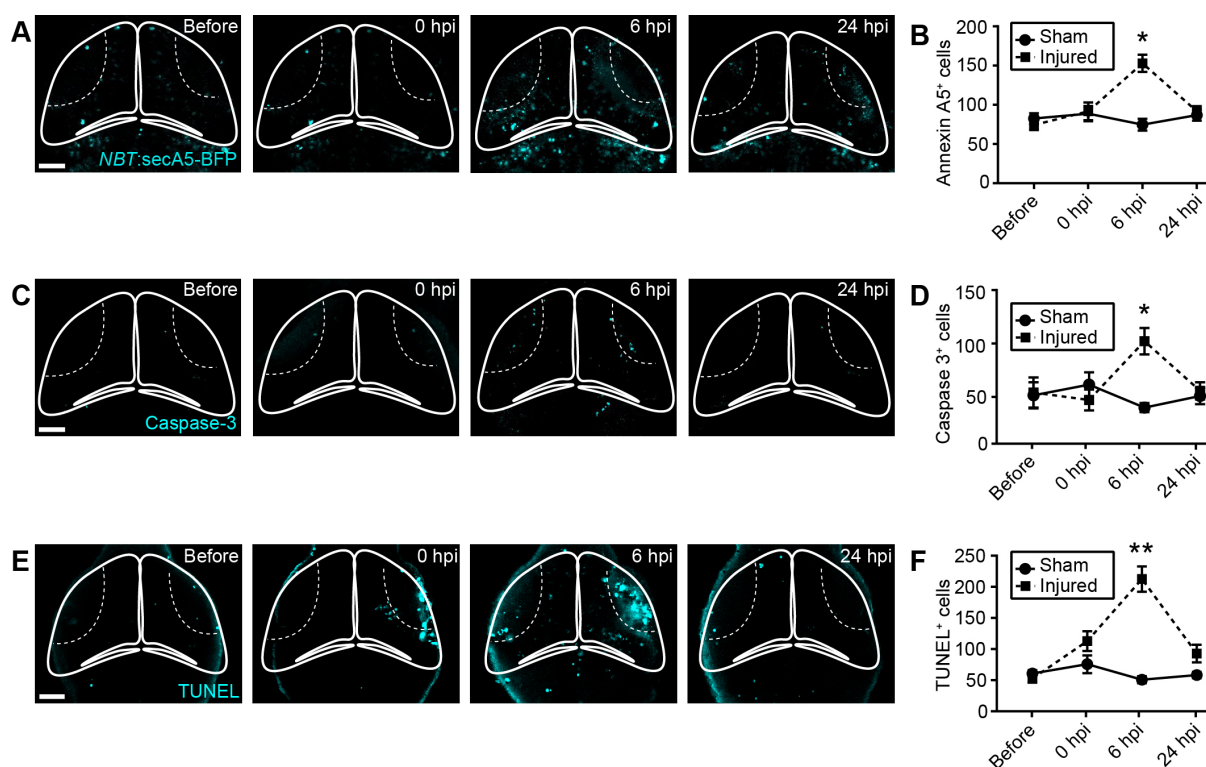

**Fig. S2. Cell death after brain injury can be detected through Annexin A5 live imaging, caspase 3 immunohistochemistry, and TUNEL staining.** (A,C,E) Confocal images of the tectum of a *NBT:secA5-BFP* animal (A), and animals after cleaved caspase 3 immunohistochemistry (B) or TUNEL staining (C), at different time points after injury. Scale bars, 50  $\mu$ m. (B,D,F) Quantification of Annexin A5<sup>+</sup> cells (B), cleaved caspase 3<sup>+</sup> cells (D) or TUNEL<sup>+</sup> cells (F).  $n \geq 6$  animals per experimental group. \*,  $p < 0.05$  and \*\*,  $p < 0.01$  in two-way ANOVA.

Figure S3

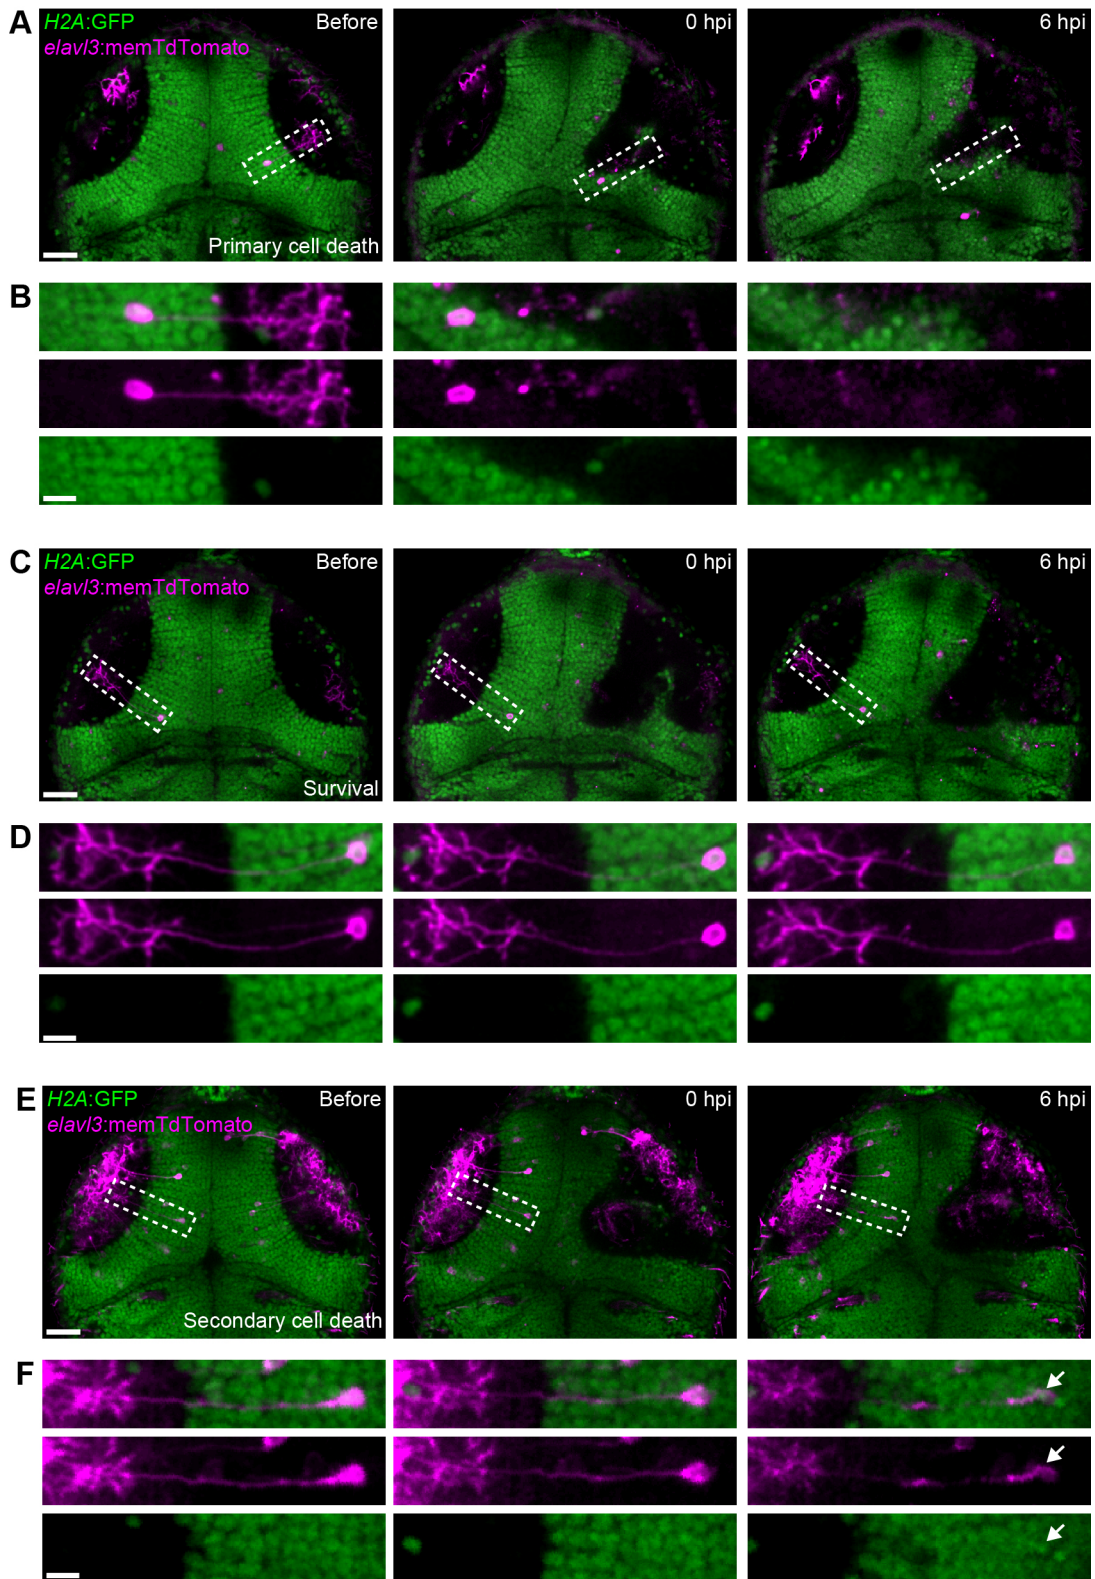

**Fig. S3. *In vivo* imaging of individual tectal neurons shows that both primary and secondary cell death occur after brain injury.** (A,C,E) Confocal images of the optic tectum of *H2A:GFP* transgenic animals, where tectal neurons labelled through injection of *elav/3:memTdtomato* plasmid DNA die through primary cell death (A), survive (C), or die through secondary cell death (E) after mechanical injury. Scale bars, 50  $\mu\text{m}$ . (B,D,F) Close-up of neurons indicated in (A), (C) and (E). White arrow indicates pyknotic nucleus. Scale bars, 10  $\mu\text{m}$ .

## Figure S4

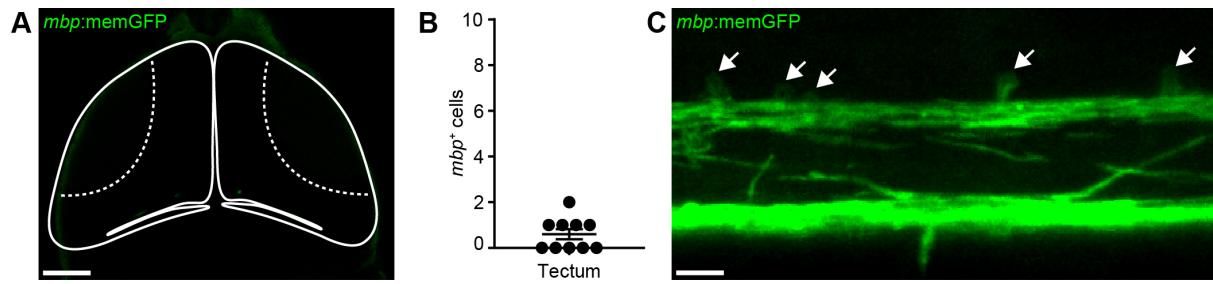

**Figure S4. Very few oligodendrocytes reside in the optic tectum at 4 dpf.** (A) Confocal image of the optic tectum of a *mbp:memGFP* animal. Scale bar, 50  $\mu\text{m}$ . (B) Quantification of *mbp*<sup>+</sup> oligodendrocytes in the optic tectum.  $n = 10$  animals. (C) Confocal image of the trunk region of a *mbp:memGFP* animal. White arrows indicate cell bodies of individual oligodendrocytes. Scale bar, 10  $\mu\text{m}$ .

Figure S5

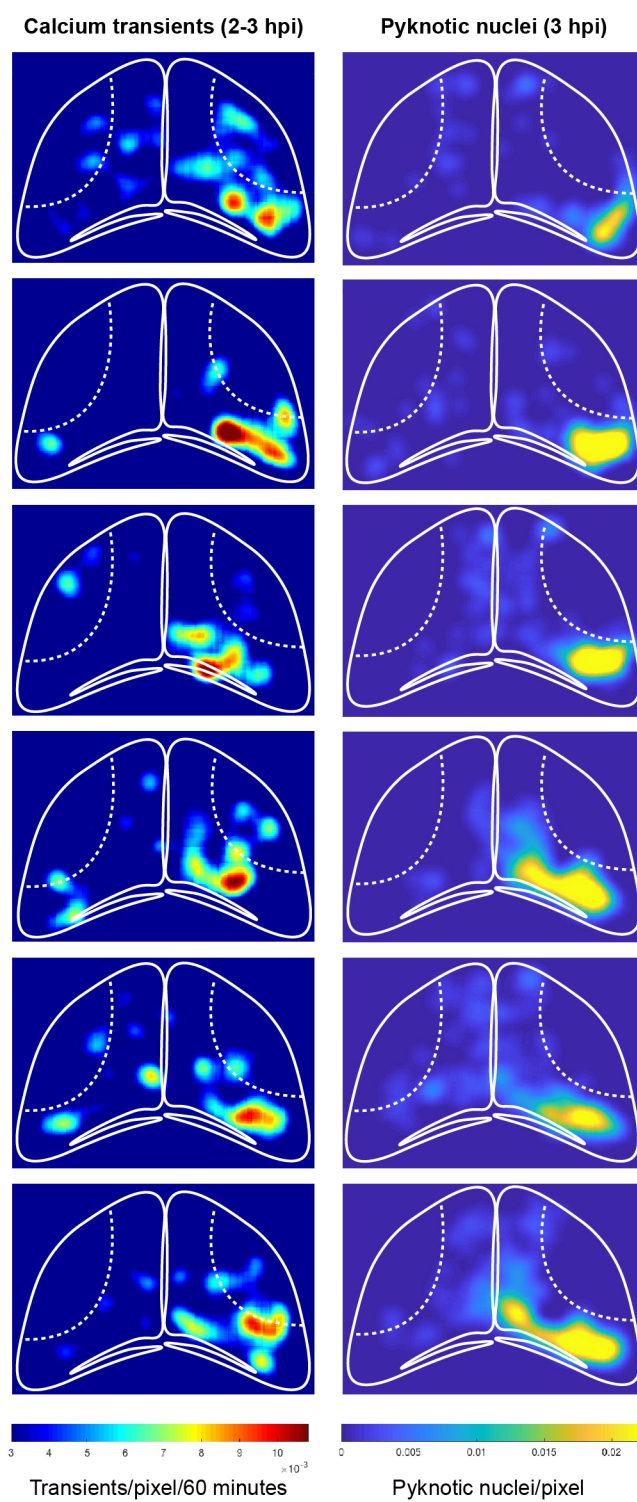

**Fig. S5. The spatial pattern of calcium transients correlates with regions of cell death.** Heat maps illustrating the spatial distribution of calcium transients occurring between 2 and 3 hpi (left), and of pyknotic nuclei at 3 hpi (right), in the same animals.

## Figure S6

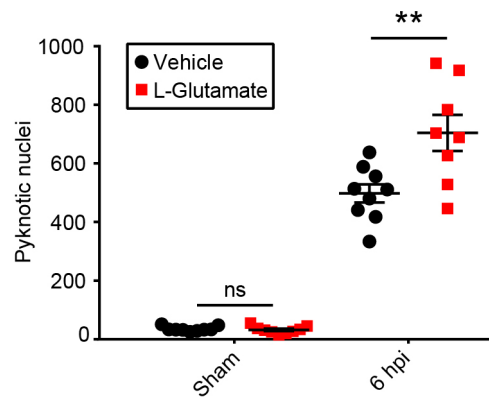

**Fig. S6. L-Glutamate exacerbates secondary cell death after brain injury.** Quantification of pyknotic nuclei in control animals or animals treated with L-Glutamate.  $n \geq 8$  animals per experimental group. ns, not significant and \*\*,  $p < 0.01$  in two-way ANOVA.



## Figure S7

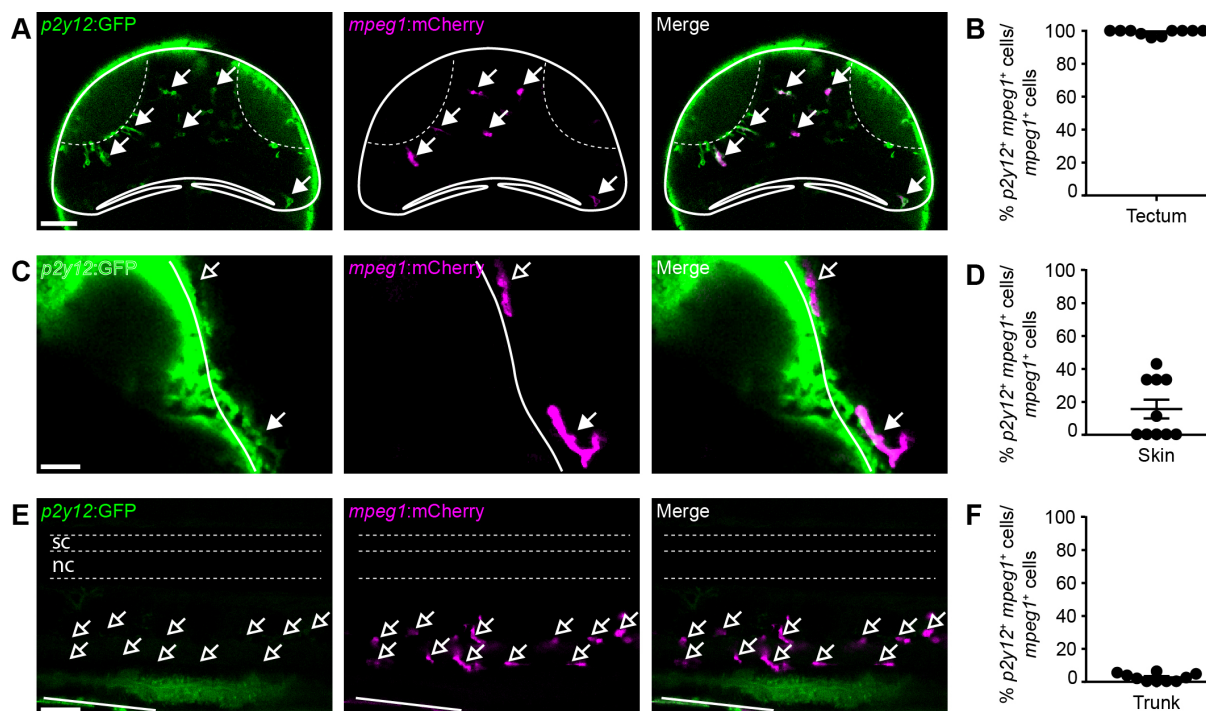

**Figure S7. P2Y12 is expressed in virtually all *mpeg1*<sup>+</sup> tectal cells and some *mpeg1*<sup>+</sup> skin cells, but not in *mpeg1*<sup>+</sup> cells in the trunk.** (A,C,E) Confocal images of the optic tectum (A), skin (C), and trunk (E) of a *p2y12*:GFP;*mpeg1*:mCherry animal. Filled or empty arrows indicate colocalisation, or lack thereof, between *p2y12* and *mpeg1*. Scale bars, 50  $\mu$ m (A,E) and 20  $\mu$ m (C). (B,D,F) Quantification of the proportion of *p2y12*<sup>+</sup>/*mpeg1*<sup>+</sup> cells among all *mpeg1*<sup>+</sup> cells in the tectum (B), skin (D) and trunk (F). n = 10 animals per experimental group.

## Figure S8

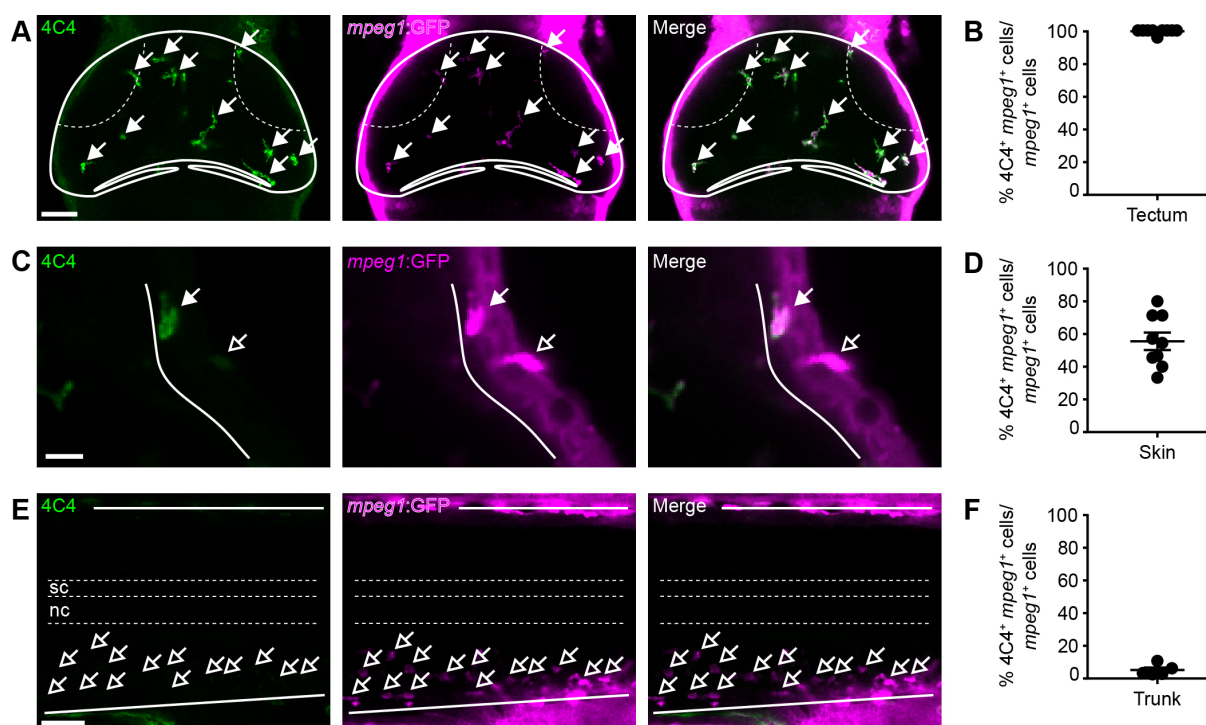

**Figure S8. 4C4 immunohistochemistry labels virtually all *mpeg1*<sup>+</sup> tectal cells and some *mpeg1*<sup>+</sup> skin cells, but not *mpeg1*<sup>+</sup> cells in the trunk.** (A,C,E) Confocal images of the optic tectum (A), skin (C) and trunk (E) of a *mpeg1*:GFP animal after 4C4 and GFP immunohistochemistry. Filled or empty arrows indicate colocalisation, or lack thereof, between 4C4 and *mpeg1*. Scale bars, 50  $\mu$ m (A,E) and 20  $\mu$ m (C). (B,D,F) Quantification of the proportion of 4C4<sup>+</sup>/*mpeg1*<sup>+</sup> cells among all *mpeg1*<sup>+</sup> cells in the tectum (B), skin (D) and trunk (F).  $n \geq 5$  animals per experimental group.

## Figure S9

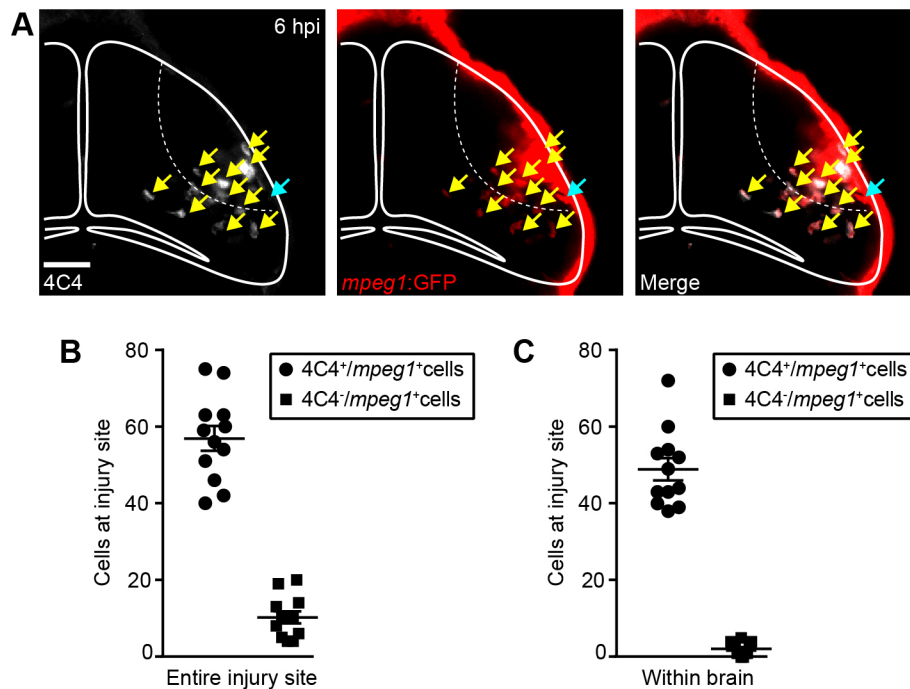

**Fig. S9.** The majority of *mpeg1*<sup>+</sup> cells at the injury site within the brain are also labelled by 4C4 immunohistochemistry. (A) Confocal images of the optic tectum at 6 hpi in *mpeg1*:GFP animals after 4C4 and GFP immunohistochemistry. Yellow arrows indicate 4C4<sup>+</sup>/*mpeg1*<sup>+</sup> cells. Light blue arrow indicates a 4C4<sup>-</sup>/*mpeg1*<sup>+</sup> cell. Scale bar, 40 μm. (B,C) Quantification of 4C4<sup>+</sup>/*mpeg1*<sup>+</sup> and 4C4<sup>-</sup>/*mpeg1*<sup>+</sup> cells at the entire injury site (B) or within the brain (C) at 6 hpi. n = 12 animals.

## Figure S10

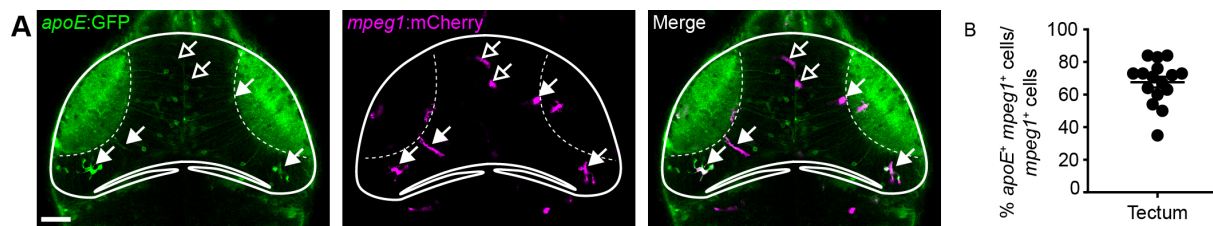

**Figure S10. ApoE is expressed in a subset of *mpeg1*<sup>+</sup> tectal cells.** (A) Confocal images of the optic tectum of an *apoE:GFP;mpeg1:mCherry* animal. Filled or empty arrows indicate colocalisation, or lack thereof, between *apoE* and *mpeg1*. Scale bar, 50  $\mu$ m. (B) Quantification of the proportion of *apoE*<sup>+</sup>/*mpeg1*<sup>+</sup> cells among all *mpeg1*<sup>+</sup> cells in the tectum. n = 16 animals.

## Figure S11

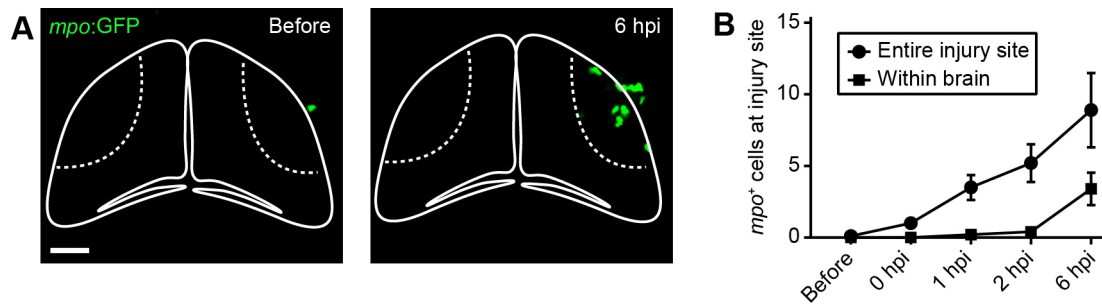

**Fig. S11. Neutrophils are recruited to the injury site, but only a few are found within the brain.** (A) Live imaging of the neutrophil reporter line *mpo:GFP* before injury and at 6 hpi. Scale bar, 50  $\mu\text{m}$ . (B) Quantification of *mpo*<sup>+</sup> cells at the entire injury site and within the brain. n = 10 animals per experimental group.

## Figure S12

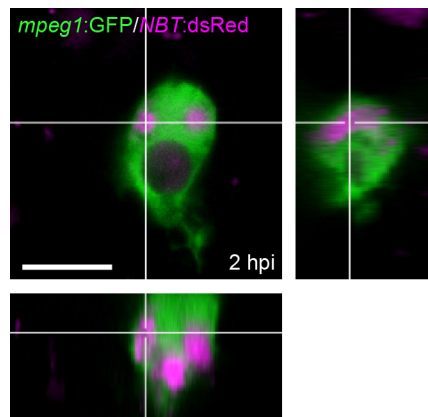

**Fig. S12. Microglia take up substantial amounts of neuronal debris after brain injury.** Orthogonal view of a microglial cell at 2 hpi in a *mpeg1:GFP;NBT:dsRed* animal. Scale bar, 10  $\mu\text{m}$ .

## Figure S13

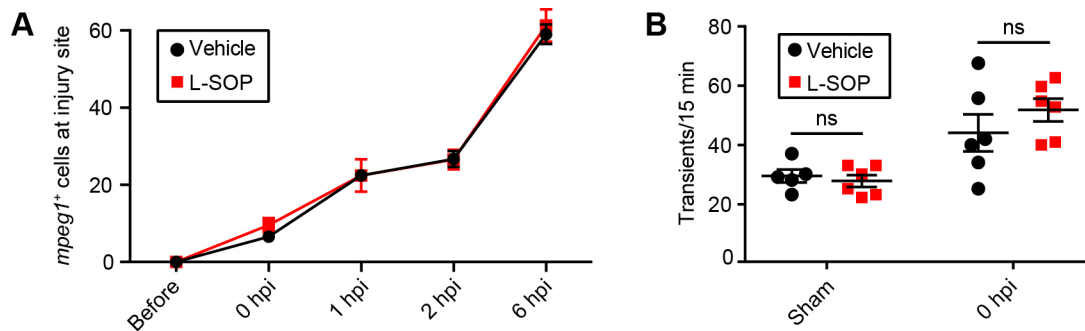

**Fig. S13. L-SOP does not change microglial recruitment or tectal calcium dynamics.** (A) Quantification of *mpeg1*<sup>+</sup> cells at the injury site within the brain in *mpeg1*:GFP animals treated with vehicle or L-SOP. *n* = 7 animals per experimental group. (B) Quantification of calcium transients by time-lapse imaging of *β-actin*:GCaMP6f larvae treated with vehicle or L-SOP. *n* ≥ 5 animals per experimental group. ns, not significant in two-way ANOVA.

## Figure S14

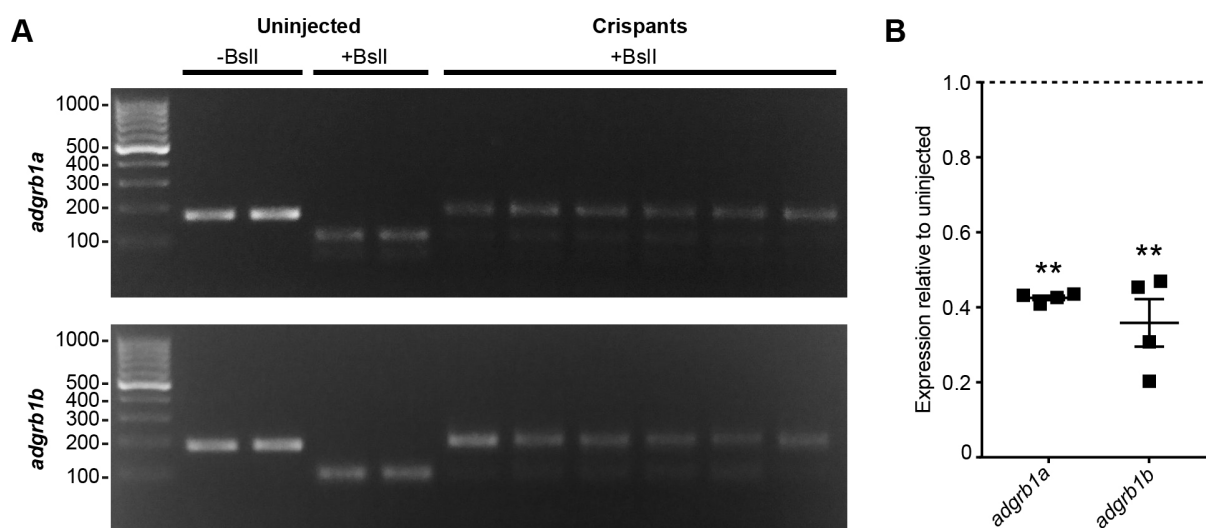

**Fig. S14. CRISPR/Cas9-mediated gene editing reduces expression of the phosphatidylserine receptors *adgrb1a* and *adgrb1b*.** (A) Restriction fragment length polymorphism analysis of the efficiency of CRISPR/Cas9-mediated gene editing of *adgrb1a* and *adgrb1b* in gRNA-injected F0 embryos. This demonstrates efficient somatic mutation of the gRNA target site, which becomes resistant to BslI restriction endonuclease digestion. One embryo was analysed per well. (B) RT-qPCR for *adgrb1a* and *adgrb1b* in gRNA-injected F0 embryos. Each data point represents one biological replicate, with mRNA from 10 animals pooled for each replicate. \*\*,  $p < 0.01$  in two-way ANOVA.



## Figure S15

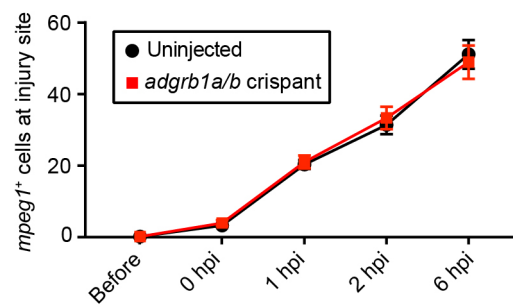

**Fig. S15. Microglial recruitment is unchanged in *adgrb1a/b* crispants.** Quantification of *mpeg1*<sup>+</sup> cells at the injury site within the brain in *adgrb1a/b* crispants as compared to uninjected *mpeg1*:GFP animals.  $n \geq 9$  animals per experimental group.

## Figure S16

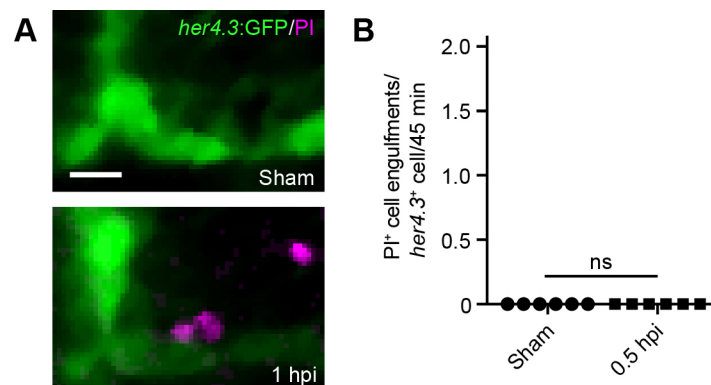

**Fig. S16. *Her4.3*<sup>+</sup> radial glial cells do not make a major contribution to debris clearance after brain injury.** (A) Confocal images of radial glial cells in *her4.3:GFP* animals before injury or at 1 hpi. Scale bar, 20  $\mu$ m. (B) Quantification of phagocytosis of PI<sup>+</sup> cells per radial glial cell from 30 to 75 min after injury. n = 6 animals per experimental group. ns, not significant in Mann-Whitney test.

**Table S1. List of mutations after CRISPR/Cas9 editing of *adgrb1a***

Mutations in 37 out of 68 sequenced alleles (54% mutation rate)

|                                                                           |           |              |     |
|---------------------------------------------------------------------------|-----------|--------------|-----|
| GTGACCCACGCAATGCTGTTGCTCCACAAGGGGGGGCTGCTGGATATATGCTTTAGTGCCCGACTGCCTG    | Wild type |              | x31 |
| GTGACCCACGCAATGCTGTTGCTCCACAAtaccacagcattaaatgctacaatactctagccaag[...]    | +341      | (-2, +343)   |     |
| [...]cagctgcctgggagactggagctcagttatgataagcaccacgacctgctcgaatga[...]       | +114      | (-125, +239) |     |
| GTGACCCACGCAATGCTGTTGCTCCACAacataaaacattgggatataatGGGGCTGCTGGATATAT       | +20       | (-3, +23)    |     |
| GTGACCCACGCAATGCTGTTGCTCCACAagatataatgcttagtcccgaCTGCTGGATATATGCTTTAG     | +14       | (-8, +22)    |     |
| GTGACCCACGCAATGCTGTTGCTCCACgcaatgctgttgcctGGGGGGGCTGCTGGATATATGCTTTAGT    | +13       | (-2, +15)    |     |
| GTGACCCACGCAATGCTGTTGCTCCACAAGGGGGGcatatatccaCTGCTGGATATATGCTTTAGTGCCC    | +9        | (-1, +10)    |     |
| GTGACCCACGCAATGCTGTTGCTCCACAgtccacagggGGCTGCTGGATATATGCTTTAGTGCCCGAC      | +6        | (-6, +12)    |     |
| GTGACCCACGCAATGCTGTTGCTCCACAactgctGGGGGGGCTGCTGGATATATGCTTTAGTGCCCGACT    | +5        |              |     |
| GTGACCCACGCAATGCTGTTGCTCCACAactggatatactGCTGCTGGATATATGCTTTAGTGCCCGACTG   | +4        | (-7, +11)    |     |
| GTGACCCACGCAATGCTGTTGCTCCACgcaatgctGGGGCTGCTGGATATATGCTTTAGTGCCCGACTGC    | +3        | (-5, +8)     |     |
| GTGACCCACGCAATGCTGTTGCTCCACAacgtatGGGGCTGCTGGATATATGCTTTAGTGCCCGACTGC     | +3        | (-3, +6)     |     |
| GTGACCCACGCAATGCTGTTGCTcccacagcaGGGGGGGCTGCTGGATATATGCTTTAGTGCCCGACTGCCT  | +1        | (-8, +9)     |     |
| GTGACCCACGCAATGCTGTTGCTCCACAacagcatGGCTGCTGGATATATGCTTTAGTGCCCGACTGCCT    | +1        | (-5, +6)     |     |
| GTGACCCACGCAATGCTGTTGCTCCACAAGGGGGGCTGCTGGATATATGCTTTAGTGCCCGACTGCCTG     | *2        |              | x3  |
| GTGACCCACGCAATGCTGTTGCTCCACAAGGGGGGCTGCTGGATATATGCTTTAGTGCCCGACTGCCTG     | *1        |              |     |
| GTGACCCACGCAATGCTGTTGCTCCACA-tatatGCTGCTGGATATATGCTTTAGTGCCCGACTGCCTG     | -1        | (-7, +6)     |     |
| GTGACCCACGCAATGCTGTTGCTCCACA-atgctGGGGCTGCTGGATATATGCTTTAGTGCCCGACTGCCTG  | -1        | (-6, +5)     |     |
| GTGACCCACGCAATGCTGTTGCTCCACA-gggggGGCTGCTGGATATATGCTTTAGTGCCCGACTGCCTG    | -1        |              |     |
| GTGACCCACGCAATGCTGTTGCTCCACA-tatatGCTGCTGGATATATGCTTTAGTGCCCGACTGCCTG     | -2        | (-2, +5)     |     |
| GTGACCCACGCAATGCTGTTGCTCCACA-gggggGGCTGCTGGATATATGCTTTAGTGCCCGACTGCCTG    | -2        |              |     |
| GTGACCCACGCAATGCTGTTGCTCCACA-gggggTCTGCTGGATATATGCTTTAGTGCCCGACTGCCTG     | -3        | (-9, +6)     |     |
| GTGACCCACGCAATGCTGTTGCTCCCA-gggggGGCTGCTGGATATATGCTTTAGTGCCCGACTGCCTG     | -3        | (-5, +2)     | x2  |
| GTGACCCACGCAATGCTGTTGCTCCACA-gggggGGCTGCTGGATATATGCTTTAGTGCCCGACTGCCTG    | -3        |              |     |
| GTGACCCACGCAATGCTGTTGCTCCA-tatatGCTGCTGGATATATGCTTTAGTGCCCGACTGCCTG       | -4        | (-10, +6)    |     |
| GTGACCCACGCAATGCTGTTGCTCCACA-gggggGGCTGCTGGATATATGCTTTAGTGCCCGACTGCCTG    | -4        | (-5, +1)     |     |
| GTGACCCACGCAATGCTGTTGCTG-gatatgctGGGGGGCTGCTGGATATATGCTTTAGTGCCCGACTGCCTG | -5        | (-13, +8)    |     |
| GTGACCCACGCAATGCTGTTGCTCC-gcaatGCTGCTGGATATATGCTTTAGTGCCCGACTGCCTG        | -5        | (-10, +5)    | x3  |
| GTGACCCACGCAATGCTGTTGCTCCACA-gctGCTGGATATATGCTTTAGTGCCCGACTGCCTG          | -5        | (-6, +1)     |     |
| GTGACCCACGCAATGCTGTT-----GGGGGGGCTGCTGGATATATGCTTTAGTGCCCGACTGCCTG        | -9        |              |     |
| GTGACCCACGCAATGCTGTTGCTCCAC-----GCTGGATATATGCTTTAGTGCCCGACTGCCTG          | -11       |              |     |
| GTGACCCACGCAATGCTG-----GGGCTGCTGGATATATGCTTTAGTGCCCGACTGCCTG              | -15       |              |     |
| GTGACCCACGCAAT-----GGGGGGCTGCTGGATATATGCTTTAGTGCCCGACTGCCTG               | -16       |              |     |
| GTGACCCACGCAATGCTG-----CTGCTGGATATATGCTTTAGTGCCCGACTGCCTG                 | -18       |              |     |
| GTGACCCACGCAATGCT-----accGGATATATGCTTTAGTGCCCGACTGCCTG                    | -21       | (-24, +3)    |     |

The gRNA target site is underlined. Inserted bases are highlighted in grey, and changed bases are highlighted in green.

**Table S2. List of mutations after CRISPR/Cas9 editing of *adgrb1b***

Mutations in 42 out of 45 sequenced alleles (93% mutation rate)

|                                                                                         |           |             |    |
|-----------------------------------------------------------------------------------------|-----------|-------------|----|
| CGACTCAGAGAACCCGCGAGTGTAAACGGACCCTCATACGGCGGCTCCGAGTGCAGAGGGGAATGGCTGGA                 | wild type |             | x3 |
| CGACTCAGAGAACCCGCGAGTGTAAACGGACCCT <u>aaccctaaccctaaccctaaccctaacc[...]</u>             | +88       | (-3, +91)   |    |
| CGACTCAGAGAACCCGCGAGTGTAAACGGACCCTC <u>Ag</u> tggggaatggctggagCGGCGGCTCCGAGTGCAG        | +15       | (-2, +17)   |    |
| CGACTCAGAGAACCCGCGAGTGTAAACGGACCCTC <u>tg</u> ccntggTACGGCGGCTCCGAGTGCAGAGGGGAAT        | +7        | (-1, +8)    |    |
| CGACTCAGAGAAC <u>ctegggg</u> gtaacggatctcattcaccCGGCGGCTCCGAGTGCAGAGGGGAATGGC           | +4        | (-24, +28)  |    |
| CGACTCAGAGAACCCGCGAGTGTAAACGGACCCTCAT <u>tc</u> accCGGCGGCTCCGAGTGCAGAGGGGAATGGC        | +4        | (-1, +5)    | x2 |
| CGACTCAGAGAACCCGCGAGTGTAAACGGACC <u>Cg</u> agtcagagGGCGGCTCCGAGTGCAGAGGGGAATGGCT        | +3        | (-7, +10)   |    |
| CGACTCAGAGAACCCGCGAGTGTAAACGGACCCTCATACGGCGGCTCCGAGTGCAGAGGGGAATGGCTGG                  | +1        |             | x2 |
| CGACTCAGAGAACCCGCGAGTGTAAACGGACCCTCA <u>gt</u> GGCGGCTCCGAGTGCAGAGGGGAATGGCTGGA         | -1        | (-3, +2)    |    |
| CGACTCAGAGAACCCGCGAGTGTAAACGGACCCTC <u>g</u> ggaccccTACGGCGGCTCCGAGTGCAGAGGGGAATGGCTGGA | -2        | (-11, +9)   |    |
| CGACTCAGAGAACCCGCGAGTGTAAACGGACCCTC <u>AC</u> GGCGGCTCCGAGTGCAGAGGGGAATGGCTGGA          | -2        |             |    |
| CGACTCAGAGAACCCGCGAGTGTAAACGG <u>g</u> ccgTACGGCGGCTCCGAGTGCAGAGGGGAATGGCTGGA           | -3        | (-7, +4)    |    |
| CGACTCAGAGAACCCGCGAGTGTAAACGGACC <u>CC</u> TACGGCGGCTCCGAGTGCAGAGGGGAATGGCTGGA          | -3        |             |    |
| CGACTCAGAGAACCCGCGAGTGTAAACGGACCCTCA <u>ga</u> CTCCGAGTGCAGAGGGGAATGGCTGGA              | -6        | (-8, +2)    |    |
| CGACTCAGAGAACCCGCGAGTGTAAACGGACCCTCA <u>at</u> catTCCGAGTGCAGAGGGGAATGGCTGGA            | -4        | (-9, +5)    | x2 |
| CGACTCAGAGAACCCGCGAGTGTAAACGGACCCT <u>CG</u> GGCGGCTCCGAGTGCAGAGGGGAATGGCTGGA           | -4        |             | x5 |
| CGACTCAGAGAACCCGCGAGTGTAAACGGACC <u>ga</u> GGCTCCGAGTGCAGAGGGGAATGGCTGGA                | -8        | (-10, +2)   |    |
| CGACTCAGAGAACCCGCGAGTGTAAACGGACC <u>GG</u> CTCCGAGTGCAGAGGGGAATGGCTGGA                  | -10       |             |    |
| CGACTCAGAGAACCCGCGAGTGTAAAC <u>ta</u> GGCGGCTCCGAGTGCAGAGGGGAATGGCTGGA                  | -11       | (-13, +2)   |    |
| CGACTCAGAGAACCCGCGAGTGTAAACGGACC <u>T</u> CCGAGTGCAGAGGGGAATGGCTGGA                     | -12       |             | x5 |
| CGACTCAGAGAACCCGCGAGTGTAA <u>gggga</u> CTCCGAGTGCAGAGGGGAATGGCTGGA                      | -13       | (-19, +6)   |    |
| CGACTCAGAGAACCCGCGAGTGT <u>AC</u> GGCGGCTCCGAGTGCAGAGGGGAATGGCTGGA                      | -13       |             |    |
| CGACTCAGAGAACCCGCGAGTGTAAACGGAC <u>CC</u> GAGTGCAGAGGGGAATGGCTGGA                       | -15       |             | x4 |
| CGACTCAGAGAACCCG <u>ag</u> TACGGCGGCTCCGAGTGCAGAGGGGAATGGCTGGA                          | -17       | (-19, +2)   | x2 |
| CGA <u>CT</u> CCGAGTGCAGAGGGGAATGGCTGGA                                                 | -40       |             |    |
| C <u>CT</u> CCGAGTGCAGAGGGGAATGGCTGGA                                                   | -42       |             |    |
| [...]-----[...]                                                                         | -98       | (-135, +37) |    |

The gRNA target site is underlined. Inserted bases are highlighted in grey.

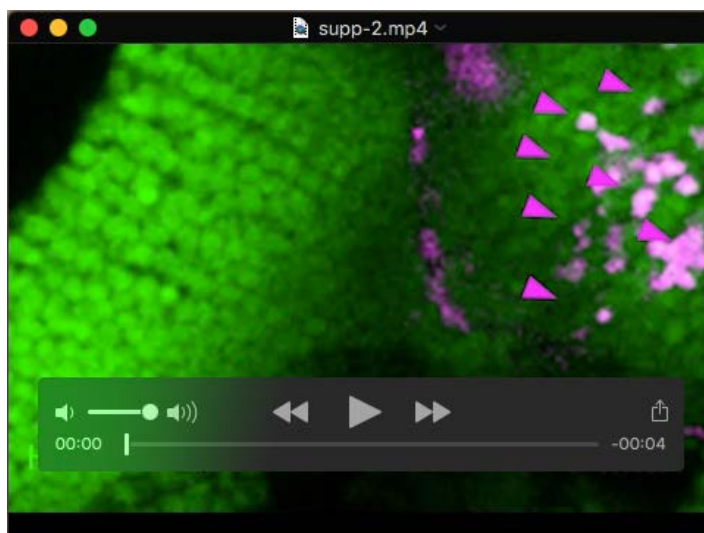

**Movie 1.** *In vivo* time-lapse imaging shows clearance of PI<sup>+</sup> cells and appearance of pyknotic nuclei after brain injury. The movie was recorded in an *H2A:GFP* animal in the presence of PI from 120 to 230 min after injury. PI<sup>+</sup> cells (magenta arrows) are removed, while pyknotic nuclei (white arrows) progressively appear within this time window. Scale bar, 15  $\mu$ m.

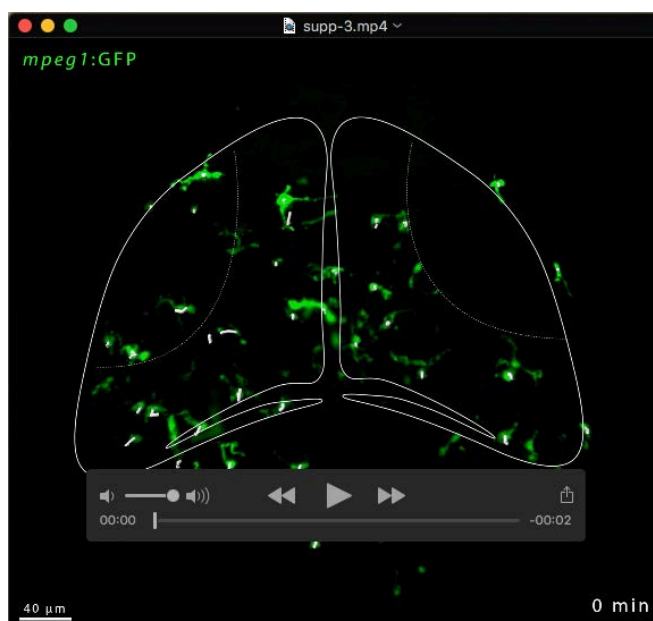

**Movie 2.** Macrophage-lineage cells display limited baseline motility in sham animals. The movie shows maximum intensity projections of z-stacks of the optic tectum in a sham *mpeg1:GFP* animal, indicating limited movement of the cell bodies of macrophage-lineage cells. The traces indicate cell body displacement of individual cells over 25 min. Scale bar, 40  $\mu$ m.

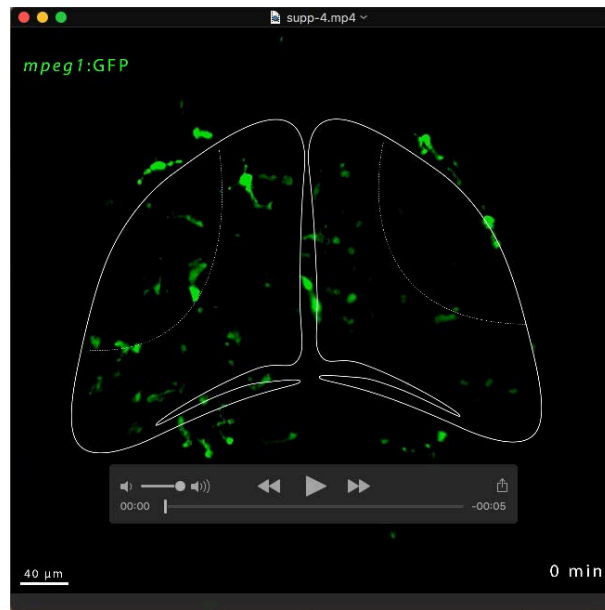

**Movie 3. After injury, macrophage-lineage cells rapidly migrate towards the site of brain injury.** The movie shows maximum intensity projections of z-stacks of the optic tectum in an injured *mpeg1:GFP* animal, revealing rapid directional movement of macrophage-lineage cells towards the lesion site after brain injury. The traces indicate cell body displacement of individual cells in the 140 min following injury. Scale bar, 40  $\mu\text{m}$ .

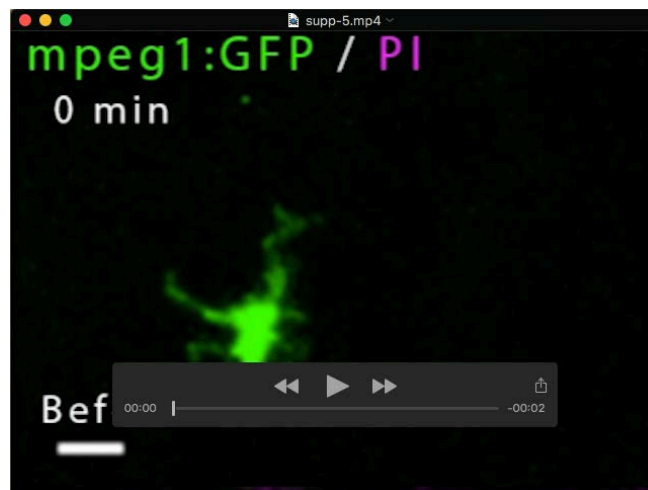

**Movie 4. Microglia actively survey their environment in sham animals.** Time-lapse imaging of a microglial cell reveals the highly dynamic processes with which it monitors its environment over 30 min in a sham *mpeg1:GFP* animal. Scale bar, 15  $\mu\text{m}$ .

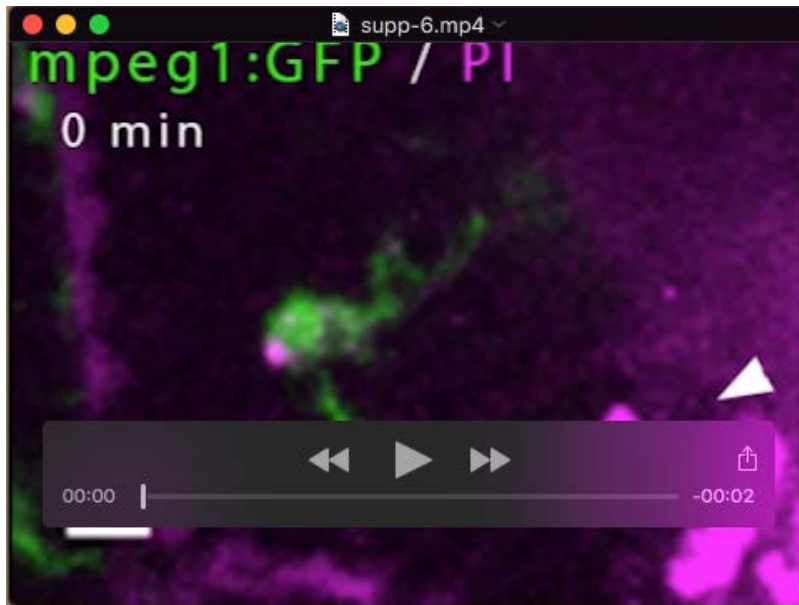

**Movie 5. Microglia rapidly engulf PI<sup>+</sup> cells after brain injury.** Time-lapse imaging shows a microglial cell as it approaches and engulfs a PI<sup>+</sup> cell after tectal injury in a *mpeg1:GFP* animal. The movie was recorded from 30 to 66 min following injury. Scale bar, 15  $\mu$ m.

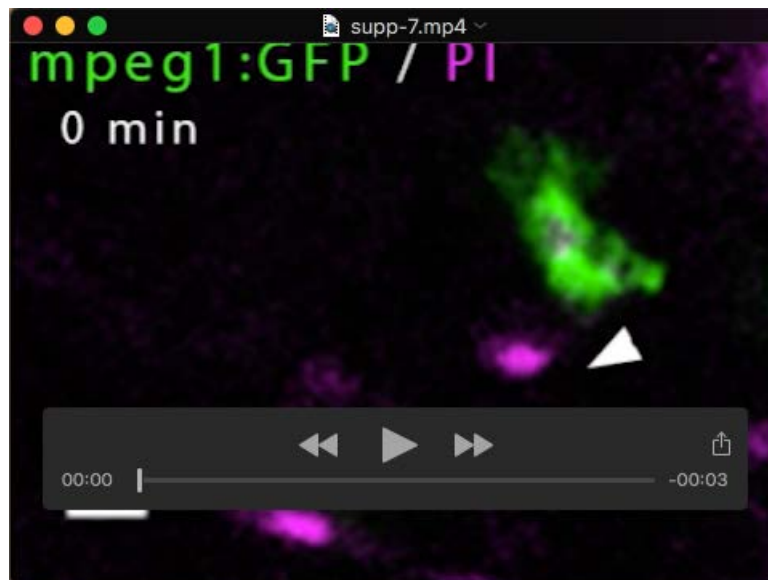

**Movie 6. Microglial phagocytosis is reduced in animals treated with L-SOP.** Time-lapse imaging of a microglial cell in a *mpeg1:GFP* animal treated with L-SOP. The microglial cell approaches a PI<sup>+</sup> cell, but does not engulf it. The movie was recorded from 30 to 72 min following injury. Scale bar, 15  $\mu$ m.

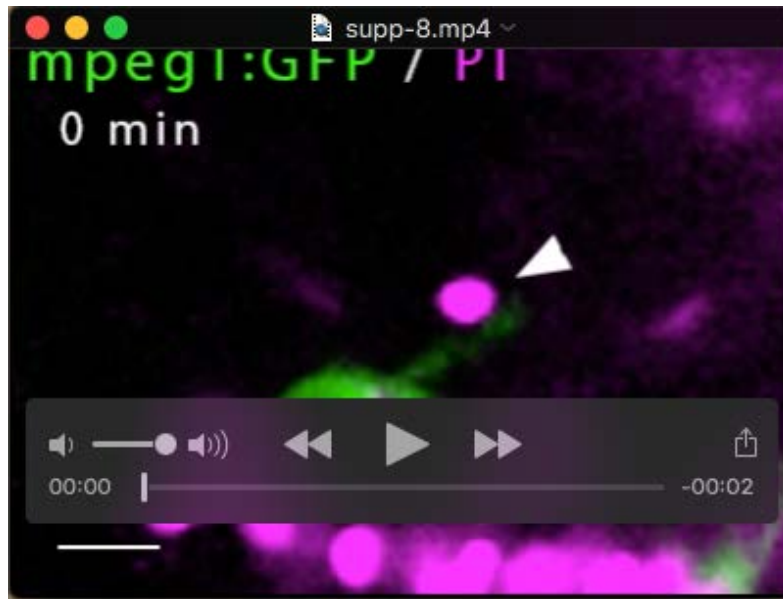

**Movie 7. Microglial uptake of cellular debris is reduced in *adgrb1a/b* crispants.**

In a *mpeg1:GFP* animal injected with *adgrb1a/b* gRNAs, a microglial cell extends a process towards a PI<sup>+</sup> cell but does not proceed to phagocytose it. The movie was recorded from 30 to 66 min following injury. Scale bar, 15  $\mu$ m.
